# Supplementary material for: Effects of Through-Bond and Through-Space Conjugations on the Photoluminescence of Small Aromatic and Aliphatic Aldimines
Source: MDPI journal article supplement (doi:10.3390/molecules27228046), 2022-11-19
Supplement: s1 [file s1]

## Supplementary Materials

# Effects of Through-Bond and Through-Space Conjugations on the Photoluminescence of Small Aromatic and Aliphatic Aldimines

Peifeng Zhuang <sup>1</sup>, Chang Yuan <sup>2</sup>, Yunhao Bai <sup>1</sup>, Changcheng He <sup>1,\*</sup>, Jiayu Long <sup>1</sup>,  
Hongwei Tan <sup>2,\*</sup> and Huiliang Wang <sup>1,\*</sup>

<sup>1</sup> Beijing Key Laboratory of Energy Conversion and Storage Materials, College of Chemistry, Beijing Normal University, Beijing 100875, China

<sup>2</sup> Key Laboratory of Theoretical and Computational Photochemistry, Ministry of Education, College of Chemistry, Beijing Normal University, Beijing 100875, China

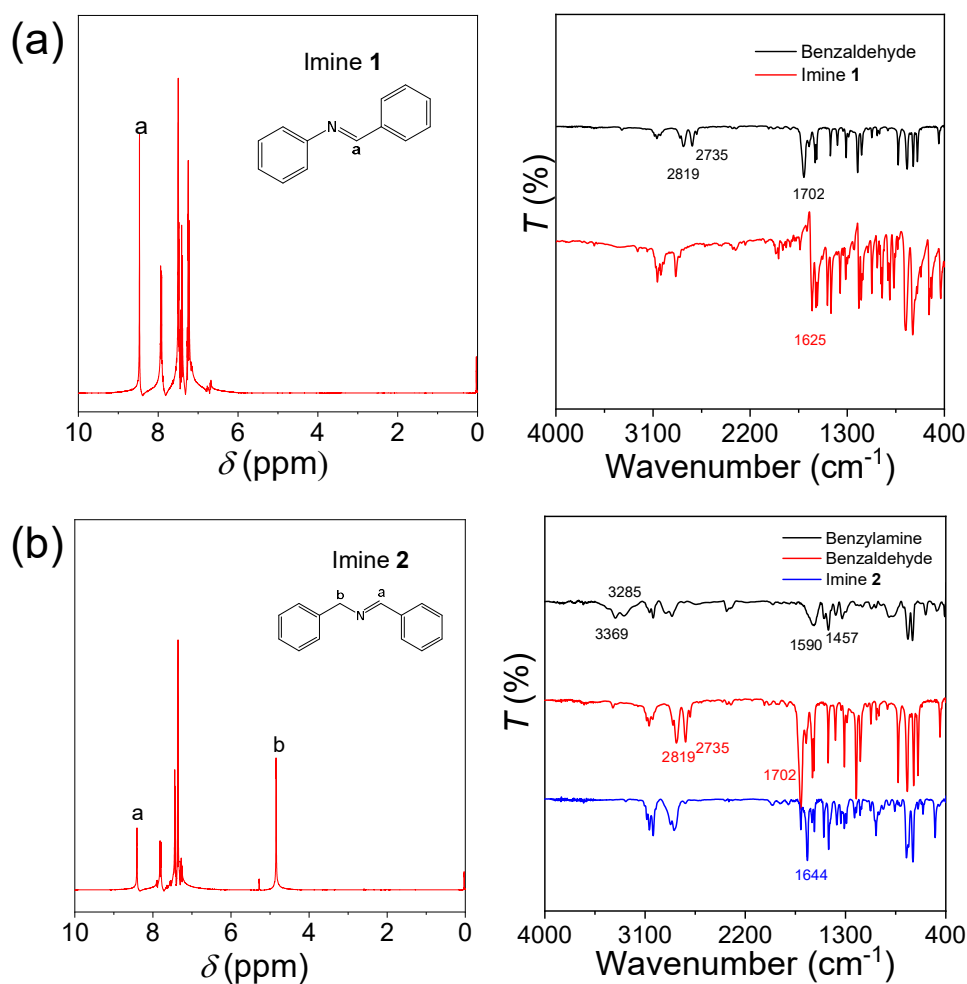

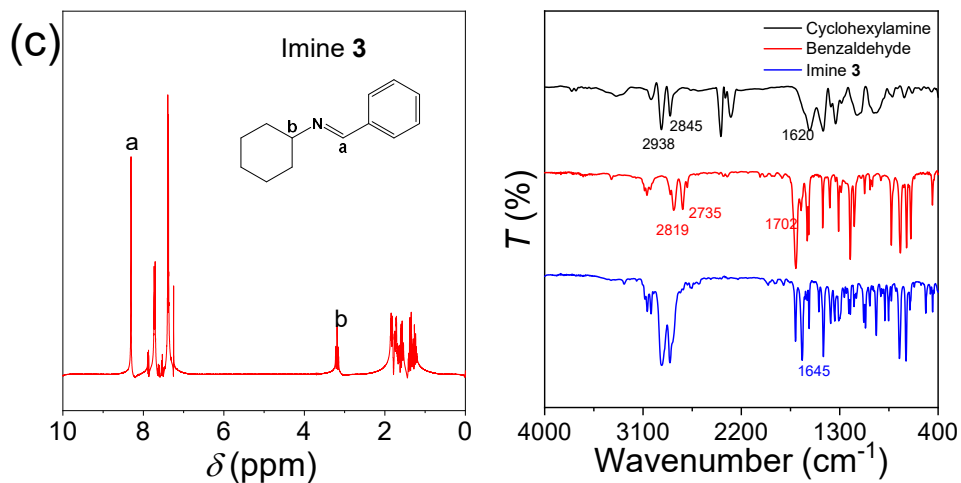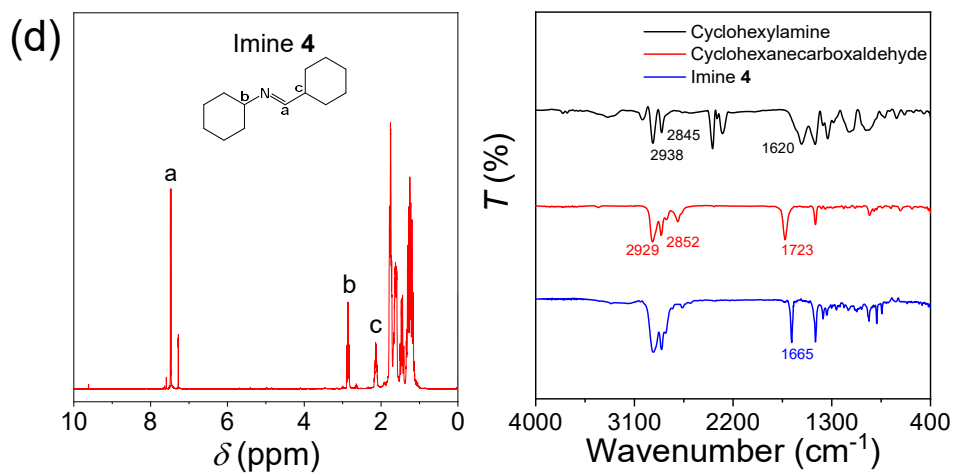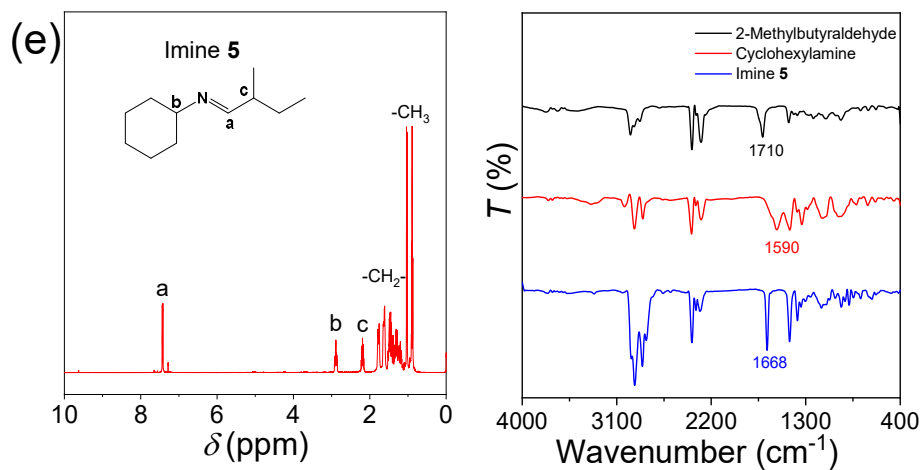

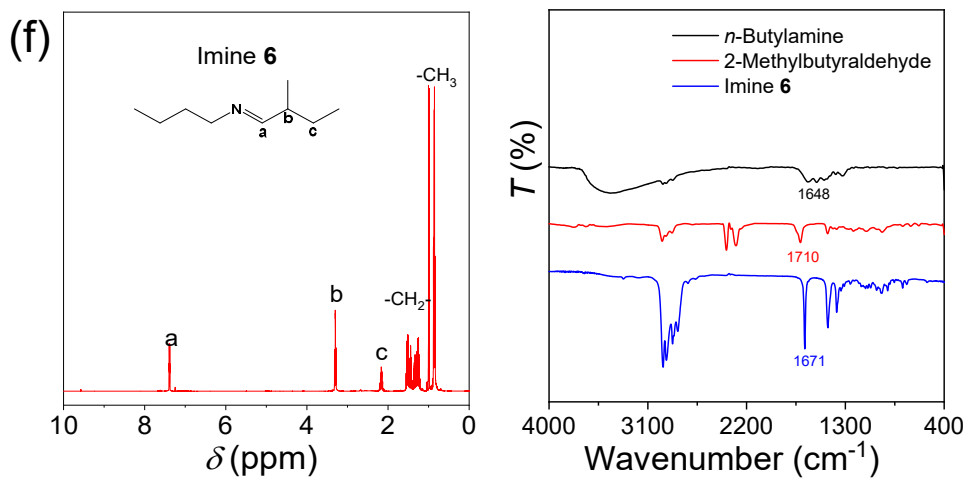

**Figure S1.**  $^1\text{H}$  NMR (left) spectra of the imines **1-6**, and FT-IR (right) spectra of the imines with comparison to the corresponding primary amines and aldehydes.

**Table S1** Characterization results of imines **1-6**.

| Chemical formula                                                                                      | $^1\text{H}$ NMR<br>$\delta$ (ppm)                                                                 | FT-IR<br>$\nu$ ( $\text{cm}^{-1}$ ) | m/z    |
|-------------------------------------------------------------------------------------------------------|----------------------------------------------------------------------------------------------------|-------------------------------------|--------|
| 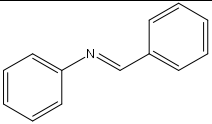<br><b>Imine 1</b>   | 8.47 (s, 1H), 8.03-7.78 (2H), 7.75 (3H), 7.41 (4H), 7.23 (1H)                                      | 3057/3013, 2891/2854, 1625          | 181.09 |
| <br><b>Imine 2</b>   | 8.41 (t, 1H), 7.81 (2H), 7.44 (3H), 7.35 (5H), 4.84 (2H)                                           | 3085/3060/3029, 2873/2835, 1644     | 195.11 |
| <br><b>Imine 3</b>   | 8.31 (s, 1H), 7.73 (2H), 7.38 (3H), 3.19 (m, 1H), 1.99-1.15 (10H)                                  | 3075/3017, 2931/2851, 1645          | 187.14 |
| <br><b>Imine 4</b> | 7.44 (d, 1H), 2.82 (m, 1H), 2.10 (1H), 1.89-0.92 (20H)                                             | 2939/2852/2812, 1665, 1442          | 193.19 |
| <br><b>Imine 5</b> | 7.38 (d, 1H), 2.85 (m, 1H), 2.16 (m, 1H), 1.82-1.11 (12H), 0.98 (d, 3H), 0.86 (t, 3H)              | 2960/2929/2858/2821, 1668, 1453     | 167.18 |
| <br><b>Imine 6</b> | 7.40 (m, 1H), 3.30 (m, 2H), 2.18 (m, 1H), 1.61-1.16 (6H), 0.99 (d, 3H), 0.87 (t, 3H), 0.84 (t, 3H) | 2962/2924/2872/2827, 1671, 1460     | 141.16 |

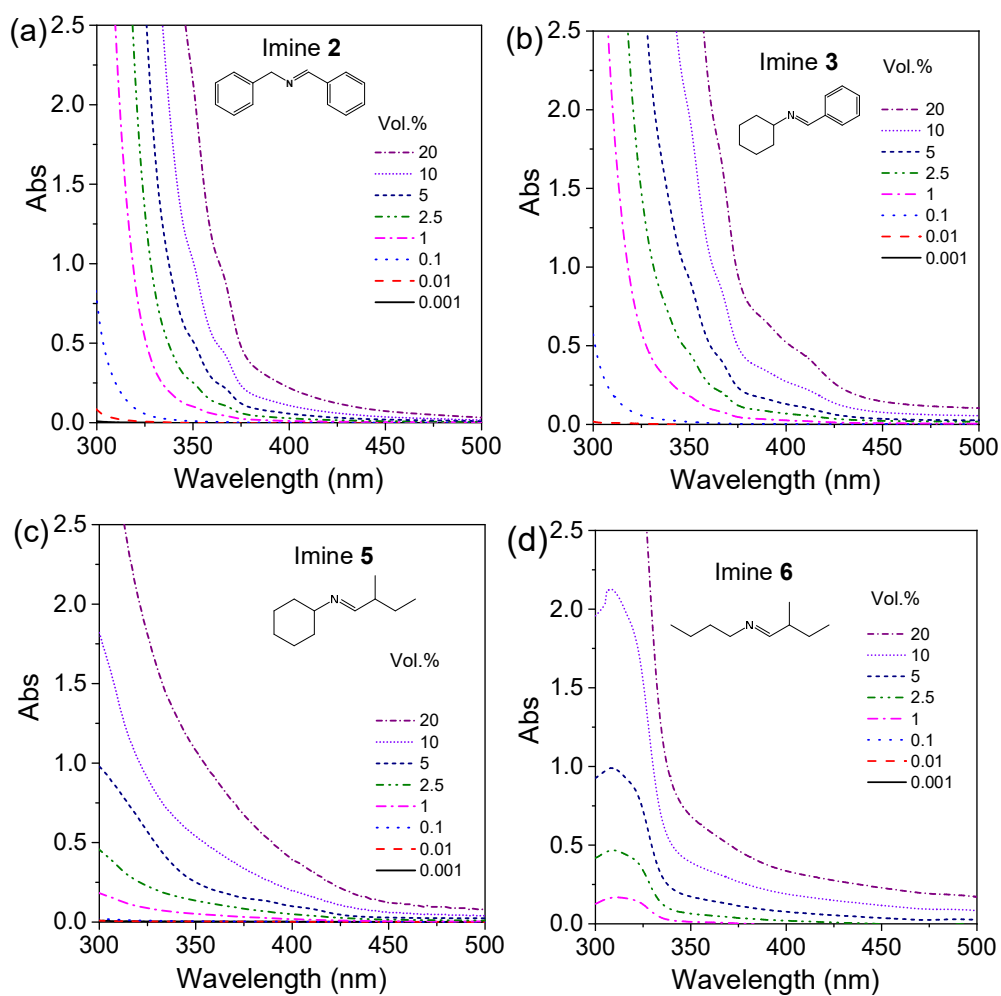

**Figure S2.** UV-vis absorption spectra of imines **2** (a), **3** (b), **5** (c) and **6** (d) ethanol solutions with different concentrations.

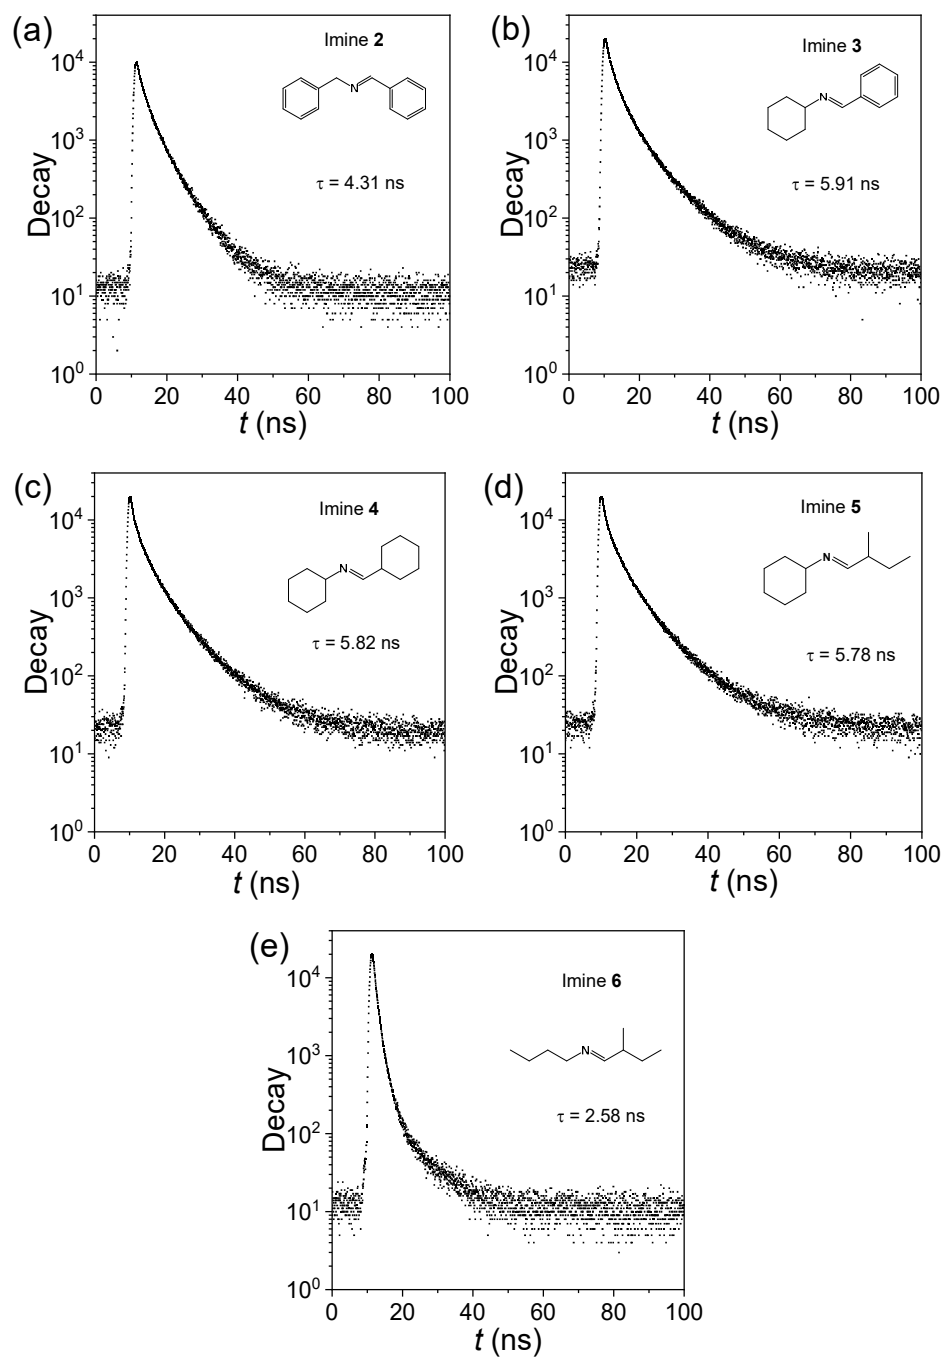

**Figure S3.** Lifetimes of imines 2-6 ethanol solutions (5 vol.%).

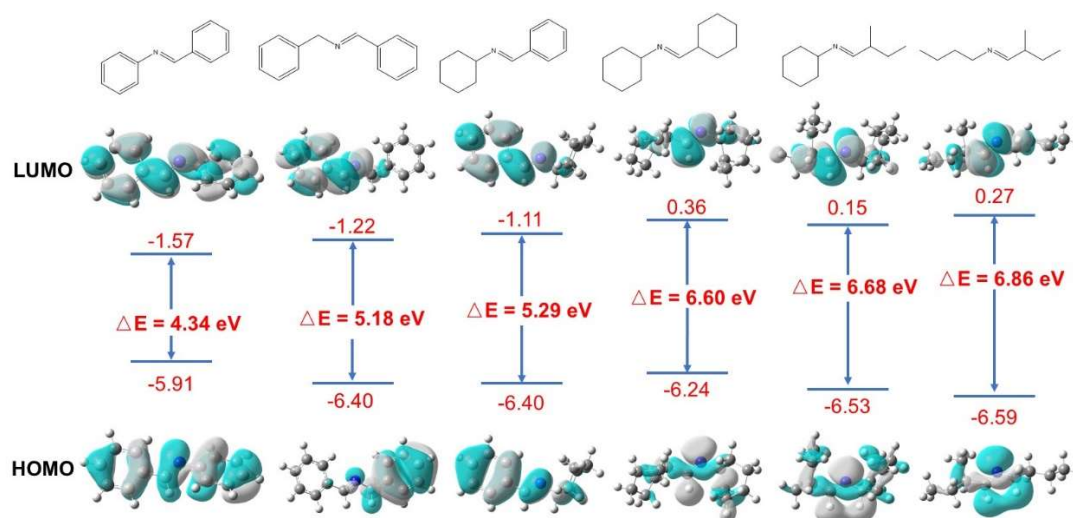

**Figure S4.** HOMO and LUMO orbitals of different imines in *trans*-configuration.

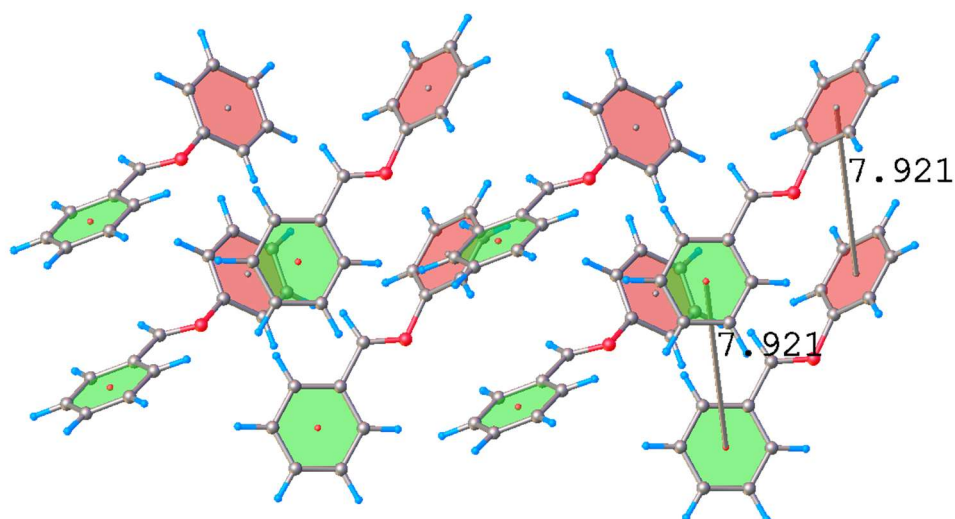

**Figure S5.** Molecular arrangement in the crystal of imine 1.

**Table S2.** Energies of imines 1-6 in the *cis* and *trans* forms and their energy differences.

| Form         | Energy (kCal/mol) |            |            |            |            |            |
|--------------|-------------------|------------|------------|------------|------------|------------|
|              | Imine 1           | Imine 2    | Imine 3    | Imine 4    | Imine 5    | Imine 6    |
| <i>cis</i>   | -349478.97        | -374152.24 | -351749.44 | -354028.65 | -305437.77 | -256838.45 |
| <i>trans</i> | -349483.62        | -374159.02 | -351766.92 | -354033.20 | -305446.29 | -256842.41 |
| $\Delta E$   | 4.66              | 6.796      | 17.48      | 4.54       | 8.53       | 3.97       |

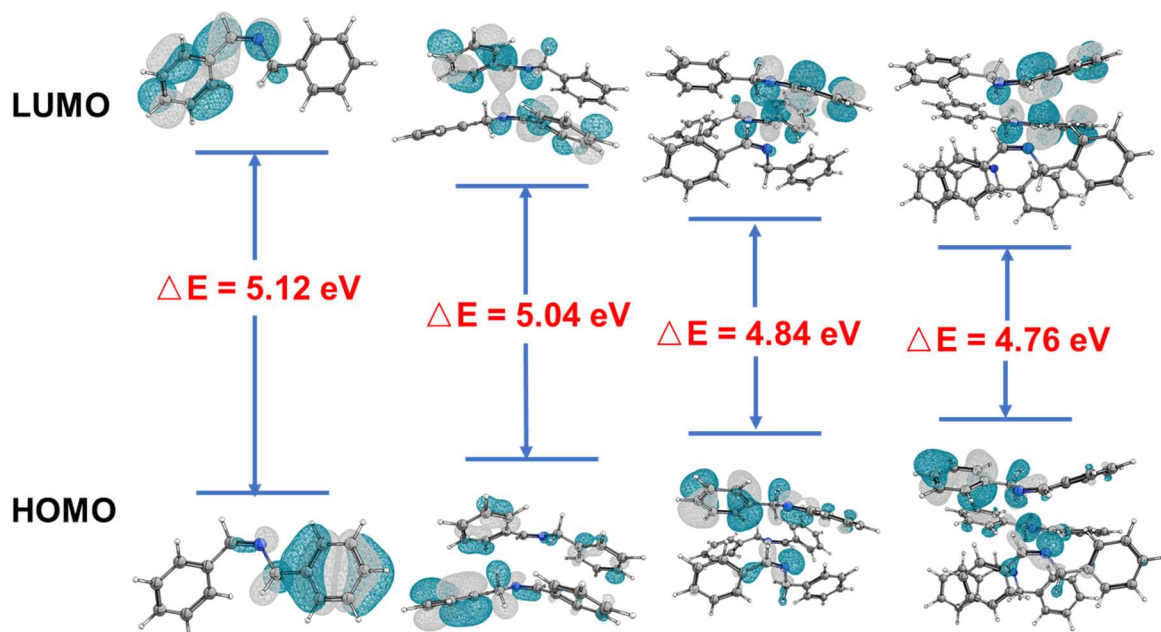

**Figure S6.** Optimized conformations of various imine 2 molecule(s) and their molecular orbital surfaces of HOMOs and LUMOs. From left to right, the molecule number in the model is 1 to 4.

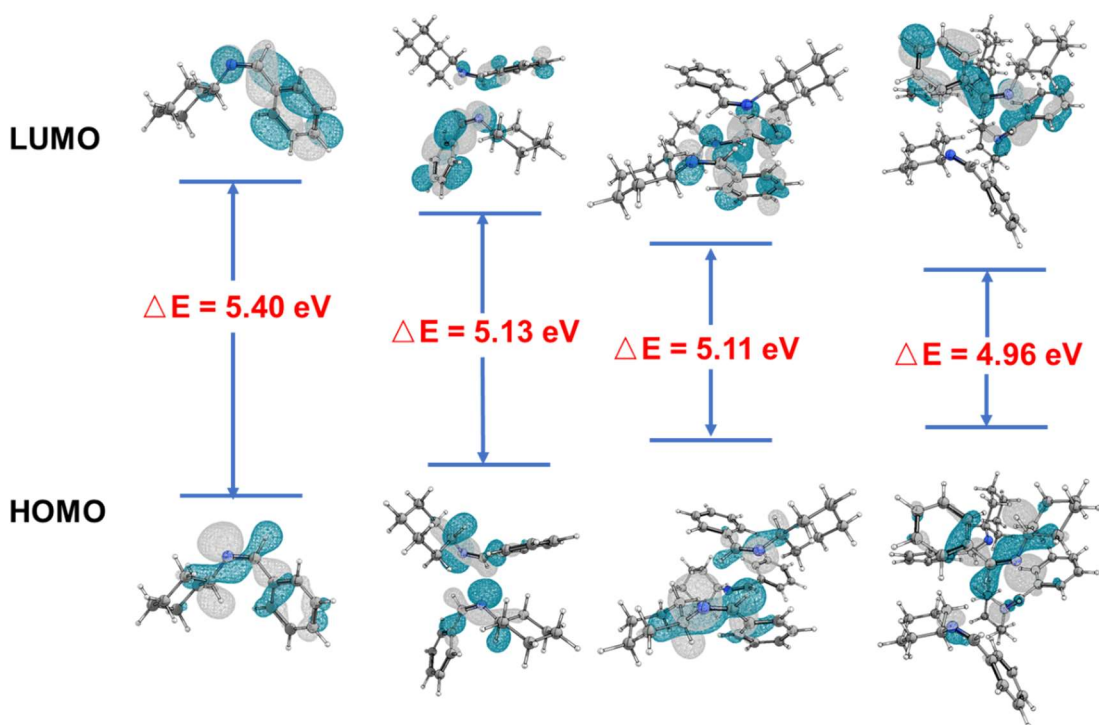

**Figure S7.** Optimized conformations of various imine 3 molecule(s) and their molecular orbital surfaces of HOMOs and LUMOs. From left to right, the molecule



number in the model is 1 to 4.

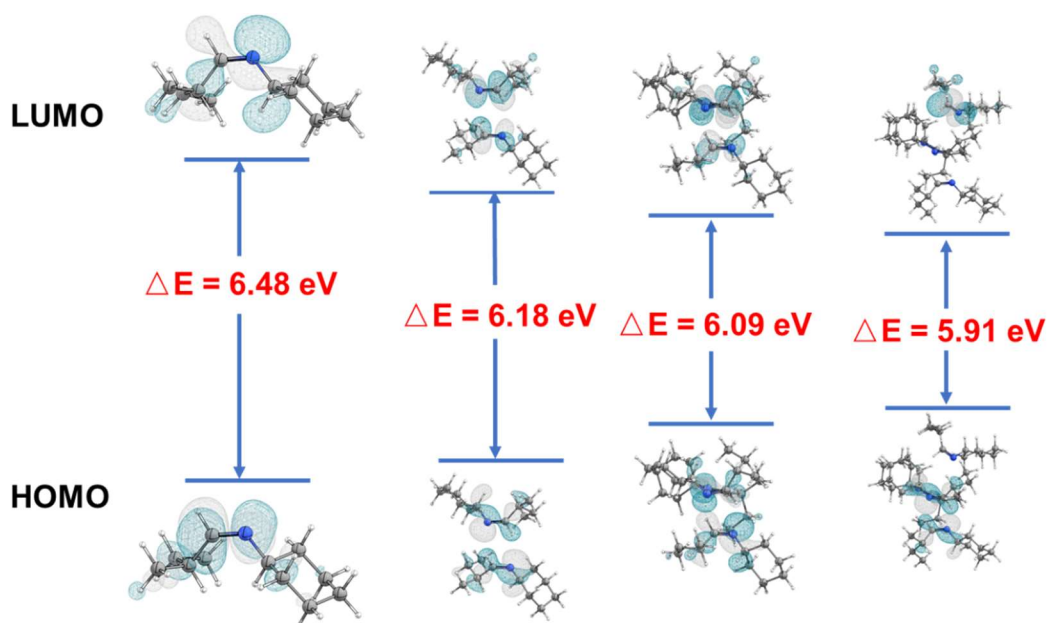

**Figure S8.** Optimized conformations of various imine **5** molecule(s) linked together by hydrogen bonds and their molecular orbital surfaces of HOMOs and LUMOs. From left to right, the molecule number in the model is 1 to 4.

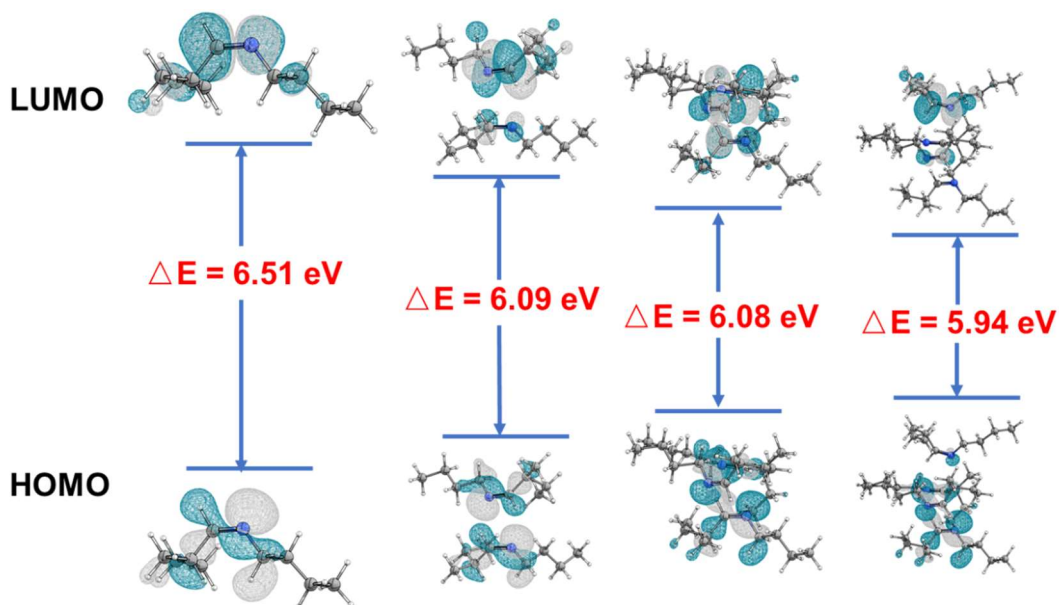

**Figure S9.** Optimized conformations of various imine **6** molecule(s) linked together by hydrogen bonds and their molecular orbital surfaces of HOMOs and LUMOs. From left to right, the molecule number in the model is 1 to 4.
